# Supplementary material for: NLRP7, Involved in Hydatidiform Molar Pregnancy (HYDM1), Interacts with the Transcriptional Repressor ZBTB16
Source: PubMed Central journal article supplement (PMC4488268; doi:10.1371/journal.pone.0130416), 2015-06-29
Supplement: pone.0130416.s001.pdf [file pone.0130416.s001.pdf]

# Figure S1

## Prey Sequence Alignment

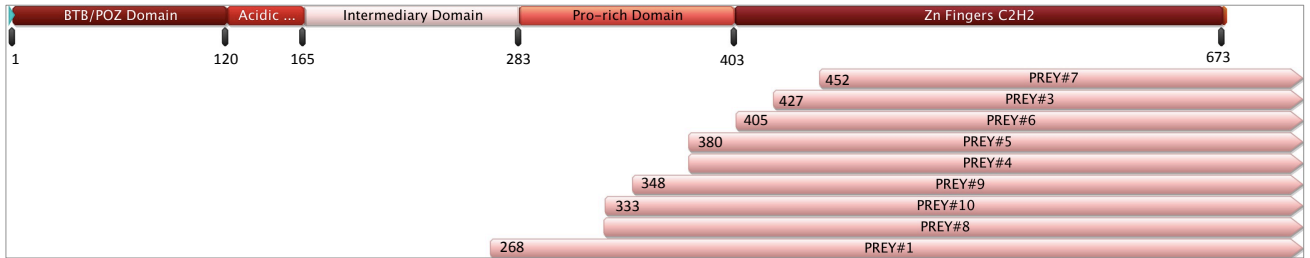

## HTX assay results (lacZ)

|   | 1 | 2  | Result after 1.5 h |  | over night |  |
|---|---|----|--------------------|--|------------|--|
| A | 1 | 9  |                    |  |            |  |
| B | 2 | 40 |                    |  |            |  |
| C | 3 |    |                    |  |            |  |
| D | 4 |    |                    |  |            |  |
| E | 5 |    |                    |  |            |  |
| F | 6 |    |                    |  |            |  |
| G | 7 |    |                    |  |            |  |
| H | 8 |    |                    |  |            |  |

## Growth on SDhigh

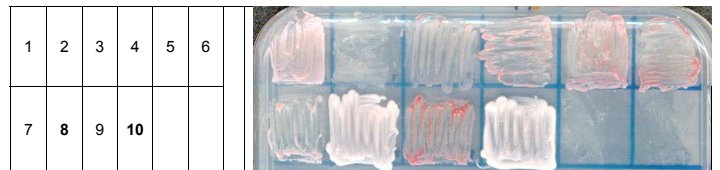

| Prey # | Growth on SD-his | lacZ positive | Growth on SD-ade | Interaction  |
|--------|------------------|---------------|------------------|--------------|
| 1      | +                | +++           | ++               | strong       |
| 2      | +                | +++           | -                | intermediate |
| 3      | +                | +++           | -                | intermediate |
| 4      | +                | +++           | +                | strong       |
| 5      | +                | +++           | +                | strong       |
| 6      | +                | +++           | +                | strong       |
| 7      | +                | +++           | -                | intermediate |
| 8      | +                | -             | +++              | intermediate |
| 9      | +                | +             | +                | intermediate |
| 10     | +                | -             | +++              | intermediate |
