# Supplementary material for: NLRP7, Involved in Hydatidiform Molar Pregnancy (HYDM1), Interacts with the Transcriptional Repressor ZBTB16
Source: PubMed Central journal article supplement (PMC4488268; doi:10.1371/journal.pone.0130416), 2015-06-29

# Figure S2

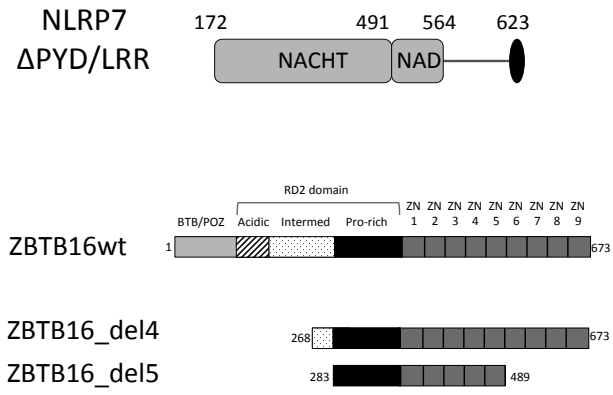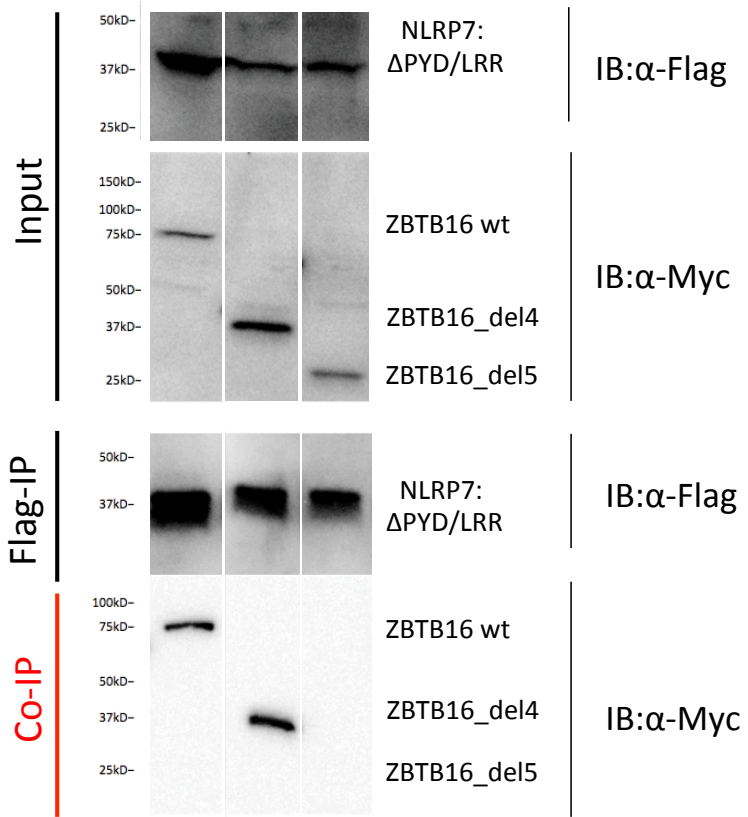

Supplement: pone.0130416.s002.pdf [file pone.0130416.s002.pdf]
