# Supplementary material for: NLRP7, Involved in Hydatidiform Molar Pregnancy (HYDM1), Interacts with the Transcriptional Repressor ZBTB16
Source: PubMed Central journal article supplement (PMC4488268; doi:10.1371/journal.pone.0130416), 2015-06-29

# Figure S5

**ZBTB16\_del1  
(aa 1-164)**

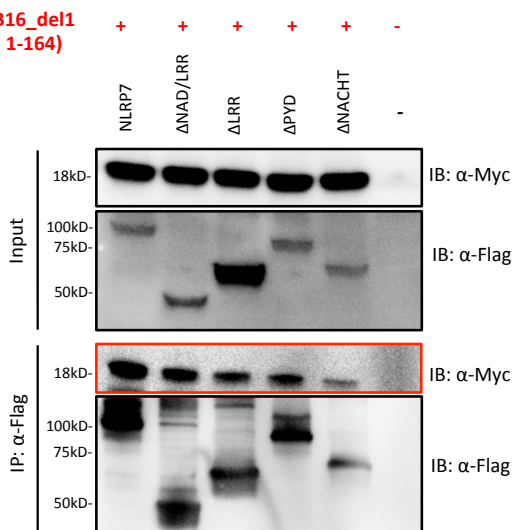

**ZBTB16\_del2  
(aa 120-483)**

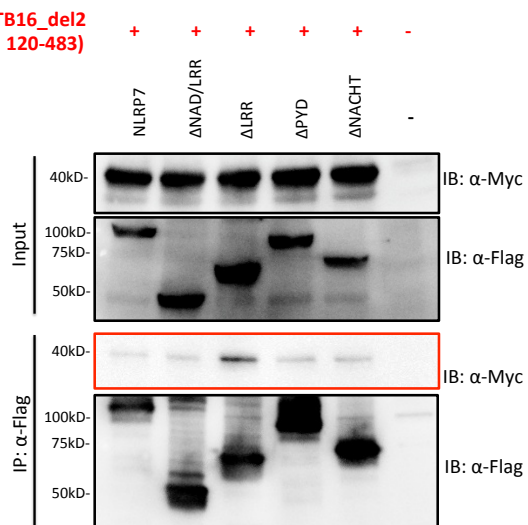

**ZBTB16\_del3  
(aa 403-673)**

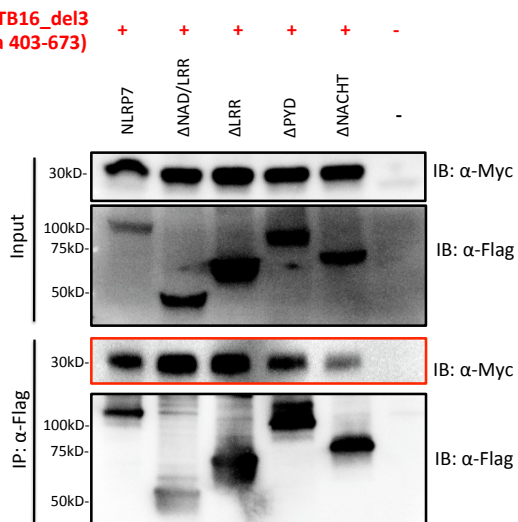

**ZBTB16\_del4  
(aa 268-673)**

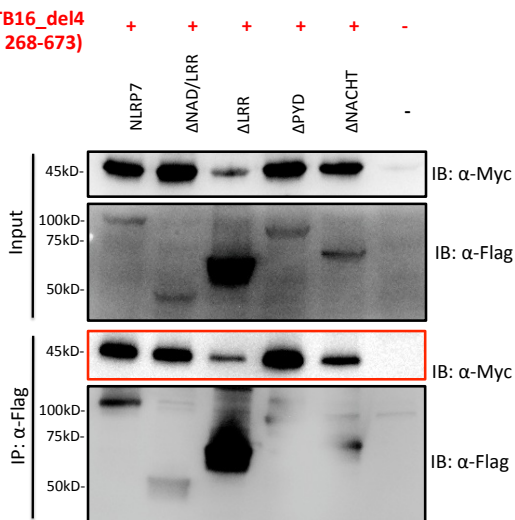

**ZBTB16\_del5  
(aa 283-489)**

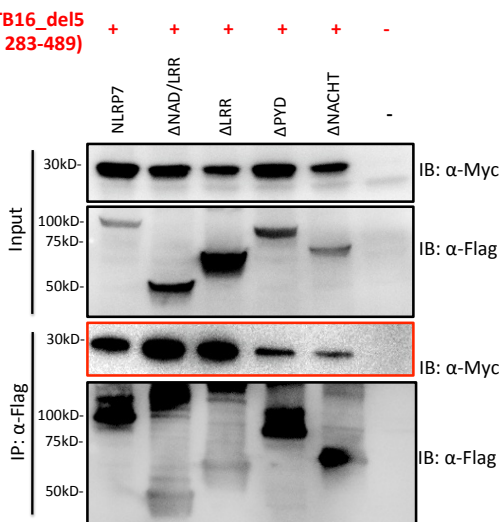

Supplement: pone.0130416.s005.pdf [file pone.0130416.s005.pdf]
