# Supplementary material for: NLRP7, Involved in Hydatidiform Molar Pregnancy (HYDM1), Interacts with the Transcriptional Repressor ZBTB16
Source: PubMed Central journal article supplement (PMC4488268; doi:10.1371/journal.pone.0130416), 2015-06-29
Supplement: pone.0130416.s008.pdf [file pone.0130416.s008.pdf]

Table S1

## Hydrogen bonds

|    | <u>NLRP7</u>    | <u>Position</u> | <u>Dist. [Å]</u> | <u>ZBTB16</u>   | <u>Position</u> |
|----|-----------------|-----------------|------------------|-----------------|-----------------|
| 1  | A:ARG 167[ NH2] | PYD-Linker      | 2.83             | B:THR 136[ OG1] | Acidic (RD2)    |
| 2  | A:ARG 167[ HE ] | PYD-Linker      | 2.17             | B:ASP 139[ OD2] | Acidic (RD2)    |
| 3  | A:ARG 167[ NH2] | PYD-Linker      | 2.80             | B:ASP 139[ OD2] | Acidic (RD2)    |
| 4  | A:GLN 155[ NE2] | PYD-Linker      | 3.29             | B:ILE 209[ O ]  | Intermed (RD2)  |
| 5  | A:SER 974[ H ]  | LRR             | 2.14             | B:ASN 577[ OD1] | ZN7             |
| 6  | A:LYS 973[ H ]  | LRR             | 2.04             | B:ASN 577[ O ]  | ZN7             |
| 7  | A:HIS 970[ NE2] | LRR             | 3.27             | B:TYR 593[ O ]  | ZN7             |
| 8  | A:ALA 916[ H ]  | LRR             | 2.30             | B:GLU 599[ OE1] | between ZN7/8   |
| 9  | A:ARG 917[ H ]  | LRR             | 2.07             | B:GLU 599[ OE1] | between ZN7/8   |
| 10 | A:LYS 889[ NZ ] | LRR             | 2.44             | B:PRO 601[ O ]  | ZN8             |
| 11 | A:ARG 455[ NH1] | NACHT           | 3.37             | B:LEU 606[ O ]  | ZN8             |
| 12 | A:ARG 455[ NH1] | NACHT           | 3.28             | B:CYS 607[ SG ] | ZN8             |
| 13 | A:ARG 455[ NH2] | NACHT           | 3.09             | B:CYS 607[ SG ] | ZN8             |
| 14 | A:SER 361[ H ]  | NACHT           | 2.20             | B:THR 633[ OG1] | ZN9             |
| 15 | A:ARG 396[ NH1] | NACHT           | 3.25             | B:LYS 665[ O ]  | near ZN9        |
| 16 | A:ARG 396[ NH2] | NACHT           | 3.51             | B:LYS 665[ O ]  | near ZN9        |
| 17 | A:LYS 379[ NZ ] | NACHT           | 2.44             | B:THR 666[ OG1] | near ZN9        |
| 18 | A:LYS 379[ NZ ] | NACHT           | 2.51             | B:THR 666[ O ]  | near ZN9        |
| 19 | A:GLY 219[ O ]  | NACHT           | 1.99             | B:SER 643[ H ]  | ZN9             |
| 20 | A:GLU 225[ OE2] | NACHT           | 2.73             | B:LYS 647[ NZ ] | ZN9             |
| 21 | A:ARG 409[ O ]  | NACHT           | 3.50             | B:LYS 653[ NZ ] | ZN9             |
| 22 | A:GLU 485[ OE1] | NACHT           | 2.70             | B:LYS 653[ NZ ] | ZN9             |
| 23 | A:GLN 914[ O ]  | LRR             | 2.12             | B:GLU 599[ H ]  | between ZN7/8   |

## Salt bridges

|   | <u>NLRP7</u>    | <u>Position</u> | <u>Dist. [Å]</u> | <u>ZBTB16</u>   | <u>Position</u> |
|---|-----------------|-----------------|------------------|-----------------|-----------------|
| 1 | A:ARG 167[ NE ] | PYD-Linker      | 2.77             | B:ASP 139[ OD2] | Acidic (RD2)    |
| 2 | A:ARG 167[ NH2] | PYD-Linker      | 2.80             | B:ASP 139[ OD2] | Acidic (RD2)    |
| 3 | A:LYS 889[ NZ ] | LRR             | 3.93             | B:GLU 599[ OE2] | between ZN7/8   |
| 4 | A:GLU 225[ OE1] | NACHT           | 3.22             | B:LYS 647[ NZ ] | ZN9             |
| 5 | A:GLU 225[ OE2] | NACHT           | 2.73             | B:LYS 647[ NZ ] | ZN9             |
| 6 | A:GLU 485[ OE1] | NACHT           | 2.70             | B:LYS 653[ NZ ] | ZN9             |
